# Supplementary material for: Transcriptional regulation of PRPF31 gene expression by MSR1 repeat elements causes incomplete penetrance in retinitis pigmentosa
Source: PubMed Central journal article supplement (PMC4725990; doi:10.1038/srep19450), 2016-01-19
Supplement: srep19450-s1.pdf [file srep19450-s1.pdf]

## **SUPPLEMENTARY DATA**

### **Transcriptional regulation of *PRPF31* gene expression by MSR1 repeat elements causes incomplete penetrance in retinitis pigmentosa**

Anna M. Rose, Amna Z. Shah, Guilia Venturini, Abhay Krishna,  
Aravinda Chakravarti, Carlo Rivolta, Shomi S. Bhattacharya

**Supplementary Figure 1:**

**European *PRPF31*-mutation carrying families. Symptomatic mutation carriers are shown in black, whereas asymptomatic mutation carriers are indicated by a black dot.**

- A. RP3835, 112kb deletion, Rose et al. Invest Ophthalmol Vis Sci. 52:6597-603.
- B. S240, c.732-737 delins 20bp, Martinez-Gimeno et al. Invest Ophthalmol Vis Sci. 44:2171-7.
- C. M637, c.769-770 insA, Martinez-Gimeno et al. Invest Ophthalmol Vis Sci. 44:2171-7.
- D. M368, c.828-829 delCA, Martinez-Gimeno et al. Invest Ophthalmol Vis Sci. 44:2171-7.
- E. Patient 85, c.527+3 A>G, Waseem et al. Invest Ophthalmol Vis Sci. 48:1330-4.
- F. Patient 2076, p.Glu27X, Waseem et al. Invest Ophthalmol Vis Sci. 48:1330-4.
- G. Patient 15590, c.527+3 A>G, Waseem et al. Invest Ophthalmol Vis Sci. 48:1330-4.
- H. Patient 16220, c.1146+2 T>C, Waseem et al. Invest Ophthalmol Vis Sci. 48:1330-4.
- I. Patient 16722, c.528-1 G>A, Waseem et al. Invest Ophthalmol Vis Sci. 48:1330-4.
- J. Patient 2181, p.Thr138Lys, Waseem et al. Invest Ophthalmol Vis Sci. 48:1330-4.
- K. F273, c.269\_273 del, Audo et al. BMC Med Genet. 11:145.
- L. Swedish, 59kb deletion, Kohn et al. Eur J Hum Genet. 17:651-5.
- M. F1706, c.709\_734dup, Audo et al. BMC Med Genet. 11:145.
- N. American, 1374+654C>G, Rio Frio et al. Hum Mutat. 30(9):1340-7.
- O. F405, c. 527+2 T>C, Audo et al. BMC Med Genet. 11:145.
- P. F28, c.666dup, Audo et al. BMC Med Genet. 11:145.
- Q. F700, c.873\_897dup, Audo et al. BMC Med Genet. 11:145.
- R. F108, c.997delC, Audo et al. BMC Med Genet. 11:145.
- S. RP1907, c.527+3 A>G, Waseem et al. Waseem et al. Invest Ophthalmol Vis Sci. 48:1330-4.
- T. RP677, IVS6-3 to-45 del, Waseem et al. Waseem et al. Invest Ophthalmol Vis Sci. 48:1330-4.
- U. Greek, p.R211Q, unpublished
- V. AD29, c.C646G, Vithana et al. Mol Cell. 8:375-81.
- W. Canadian, DelC at transcription start site, Rose et al. Hum Mol Genet. 21:4126-37.
- X. Romani, IVS6+1 G>T, Chakarova et al. Mol Vis. 12:909-14.
- Y. AD24, c.527+3 A>G, unpublished
- Z. AD5, 11bp deletion, Vithana et al. Mol Cell. 8:375-81.
- AA. AD2, 11kb deletion, Rose et al. Invest Ophthalmol Vis Sci. 52:6597-603.
- AB. AD11, IVS1+54 T>C, unpublished

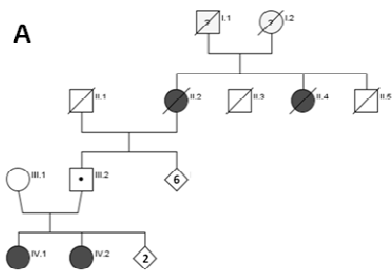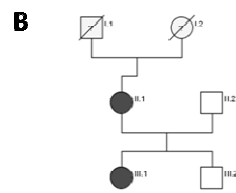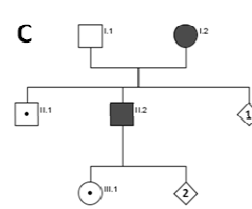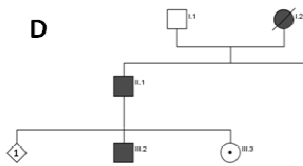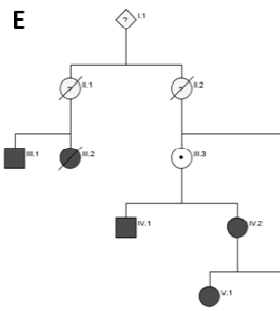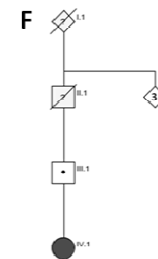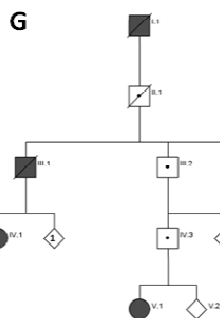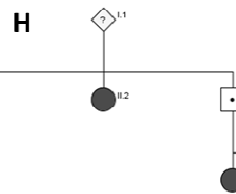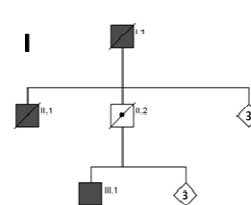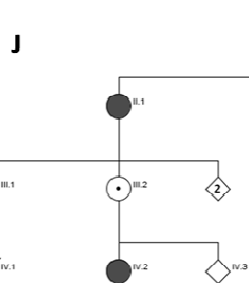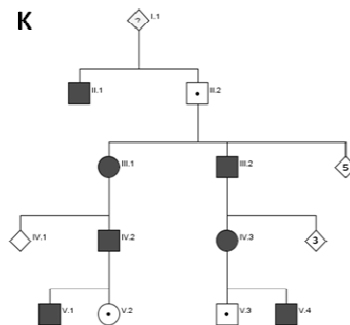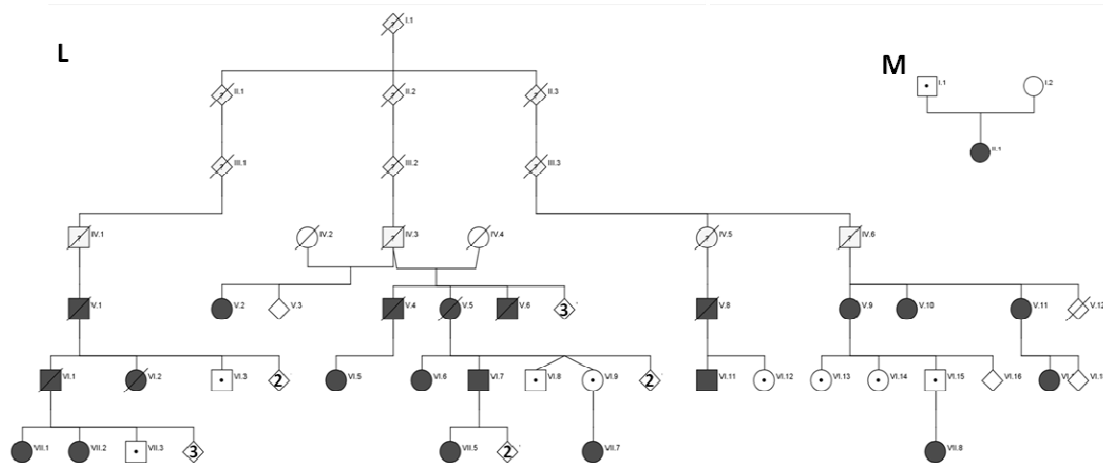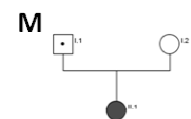

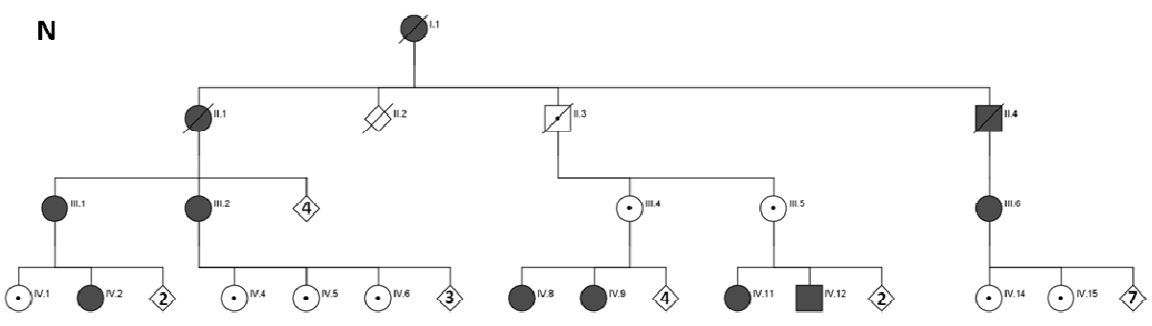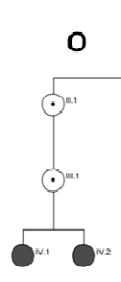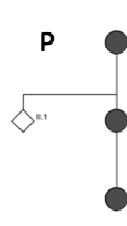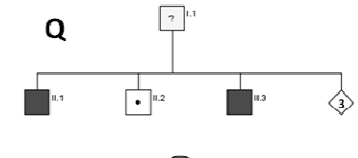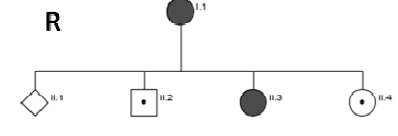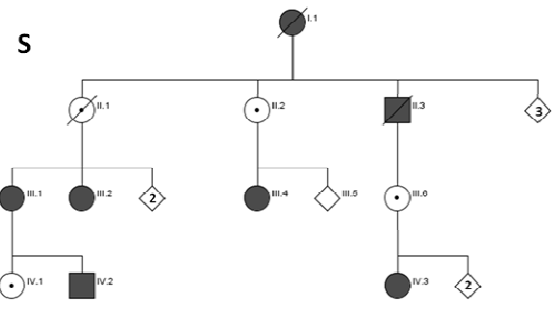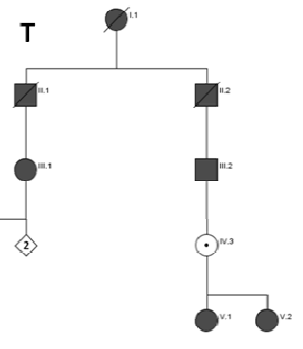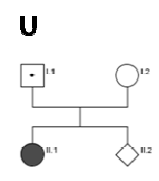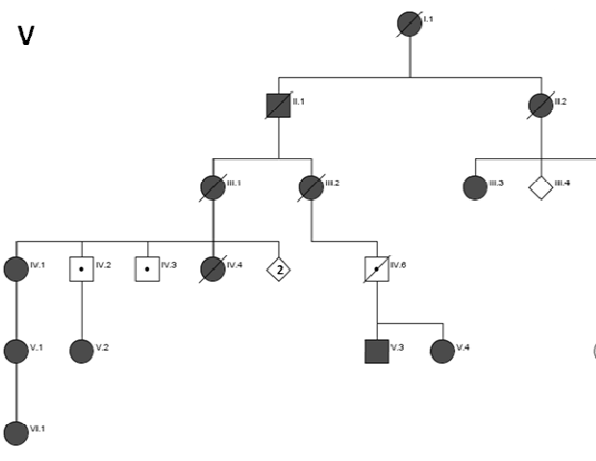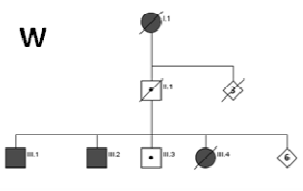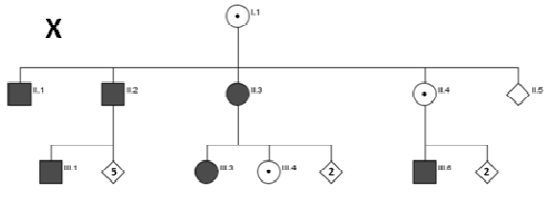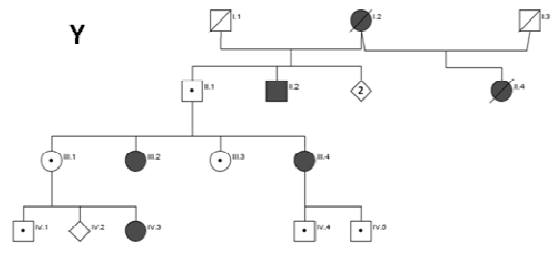

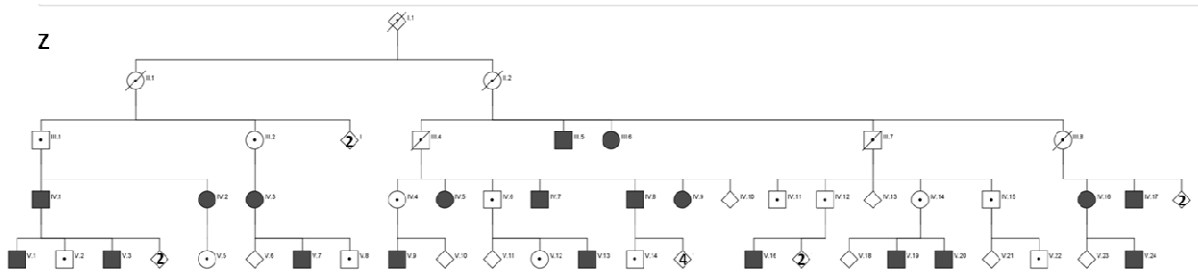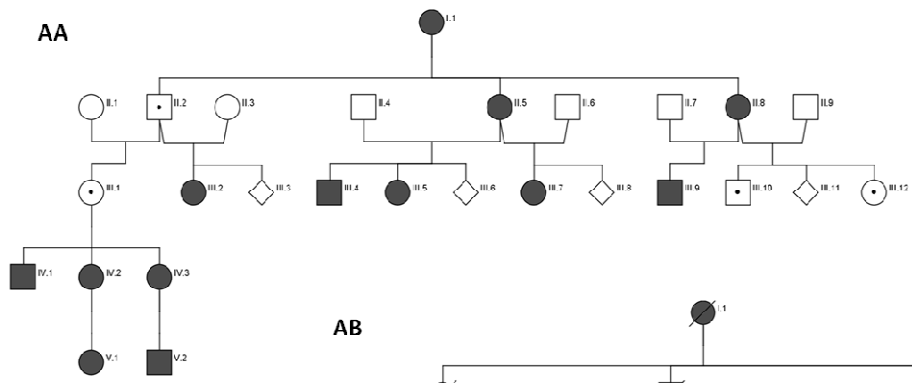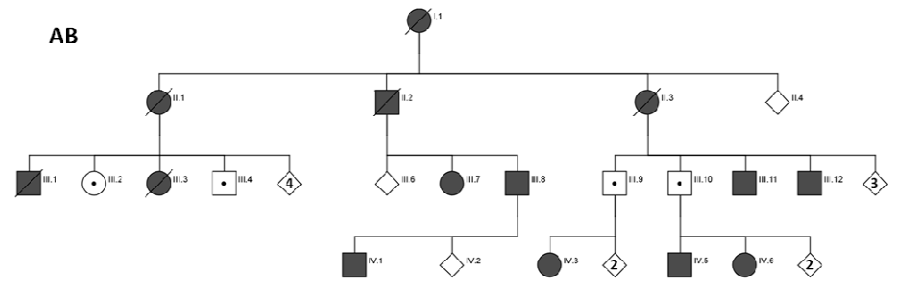

## Supplementary Figure 2

**East Asian (Japanese/Chinese) *PRPF31*-mutation carrying families. Symptomatic mutation carriers are shown in black, whereas asymptomatic mutation carriers are indicated by a black dot.**

- A. Chinese, c. delAA, Yang et al. BMJ Open. 3:e004030.
- B. ADRP-HT, c.196\_197delAA, Xu et al. Mol Vis. 18:3021
- C. ADRP-LG, c.544\_618del75bp, Xu et al. Mol Vis. 18:3021
- D. ADRP-XL, c.T895C, Xu et al. Mol Vis. 18:3021
- E. ADRP-LLN, c.615delC, Xu et al. Mol Vis. 18:3021
- F. Chinese, 12bp deletion, Wang et al. Am J Med Genet A. 121A:235-9.
- G. Family 1, 1142delG, Sato et al. Am J Ophthalmol. 140:537-40.
- H. Family 2, 1155-1159indel, Sato et al. Am J Ophthalmol. 140:537-40.
- I. Chinese, IVS5-1G>A, Xia et al. Mol Vis. 10:361-5.
- J. Family 3, IVS6-3 to -45 del, Sato et al. Am J Ophthalmol. 140:537-40.
- K. Japanese, c.1142delG, Taira et al. Jpn J Ophthalmol.51:45-8
- L. Chinese, IVS1+1G>T, Liu et al. Biochem Biophys Res Commun. 367:420-6.

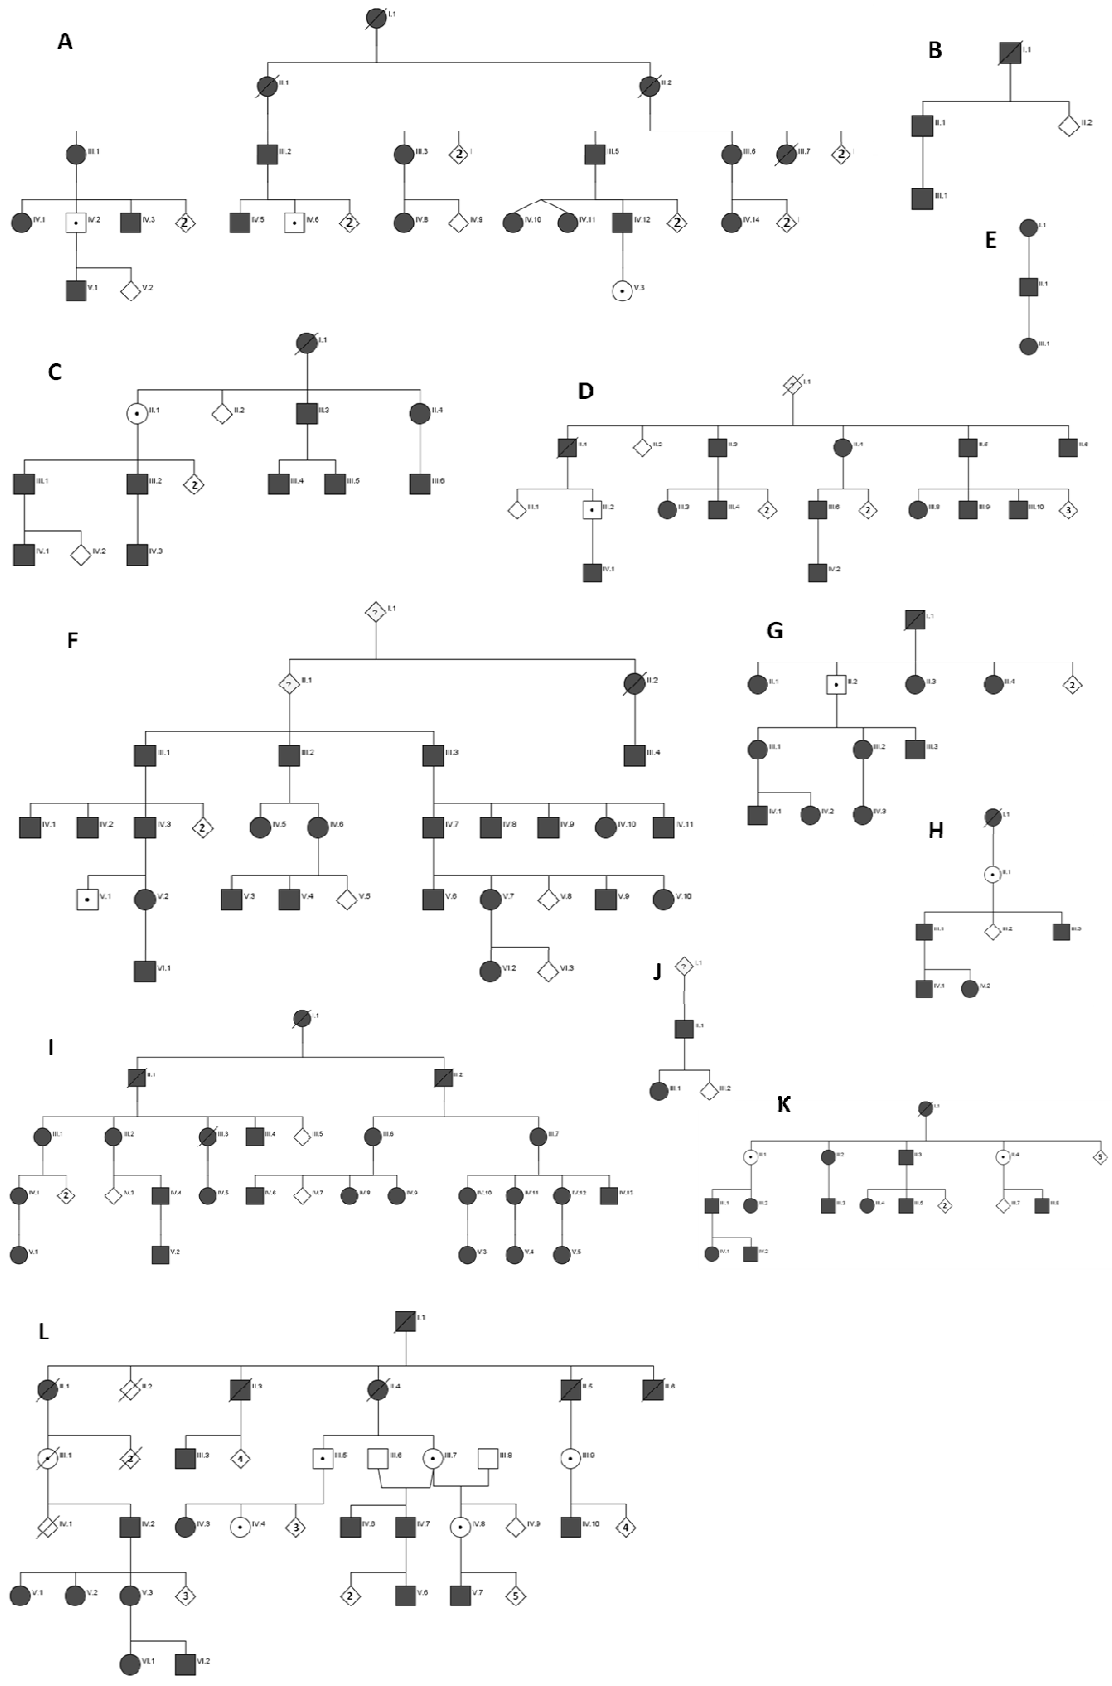

| Fragment                         | Cell Line | Firefly     | Renilla     | Ratio       | Ratio (adjusted) | Ratio:pTK   |
|----------------------------------|-----------|-------------|-------------|-------------|------------------|-------------|
| pGL3-basic<br>(negative control) | HeLa      | 14          | 117624      | 0.000119023 | 0.119023329      | 0.002767984 |
|                                  |           | 12          | 91131       | 0.000131679 | 0.131678573      | 0.003062292 |
|                                  |           | 21          | 107741      | 0.000194912 | 0.194911872      | 0.004532834 |
|                                  |           | 29          | 140123      | 0.000206961 | 0.206961027      | 0.004813047 |
|                                  |           | 33          | 121555      | 0.000271482 | 0.271482045      | 0.006313536 |
|                                  |           | 38          | 122809      | 0.000309424 | 0.309423576      | 0.007195897 |
|                                  |           | 48          | 133476      | 0.000359615 | 0.359615212      | 0.008363144 |
|                                  |           | 59          | 120672      | 0.000488929 | 0.488928666      | 0.011370434 |
|                                  |           | 70          | 127254      | 0.000550081 | 0.55008094       | 0.01279258  |
|                                  |           | 79          | 123933      | 0.000637441 | 0.637441198      | 0.014824214 |
|                                  |           | 84          | 129654      | 0.000647878 | 0.647878199      | 0.015066935 |
| pTK<br>(positive control)        | HeLa      | 1553        | 36505       | 0.042542118 | 42.54211752      | 0.98935157  |
|                                  |           | 2826        | 61386       | 0.046036556 | 46.03655557      | 1.070617571 |
|                                  |           | 2825        | 68241       | 0.0413974   | 41.39740039      | 0.962730242 |
|                                  |           | 3379        | 72188       | 0.046808334 | 46.8083338       | 1.088565902 |
|                                  |           | 3154        | 63474       | 0.049689637 | 49.6896367       | 1.155572947 |
|                                  |           | 2018        | 44001       | 0.045862594 | 45.86259403      | 1.066571954 |
|                                  |           | 2433        | 53834       | 0.045194487 | 45.19448676      | 1.051034576 |
|                                  |           | 1758        | 36688.4     | 0.047917053 | 47.9170528       | 1.114350065 |
|                                  |           | 1512        | 35467.6     | 0.042630457 | 42.63045709      | 0.991405979 |
|                                  |           | 1639        | 39659.6     | 0.041326742 | 41.32674223      | 0.961087029 |
| pGL3-basic<br>(negative control) | RPE-1     | 66          | 135495      | 0.000487103 | 0.487102845      | 0.036350959 |
|                                  |           | 70          | 124005      | 0.000564493 | 0.564493367      | 0.042126371 |
|                                  |           | 86          | 134868      | 0.000637661 | 0.637660527      | 0.047586607 |
|                                  |           | 71          | 79219       | 0.00089625  | 0.896249637      | 0.066884301 |
|                                  |           | 58          | 72427       | 0.000800806 | 0.800806329      | 0.059761666 |
|                                  |           | 88          | 77754       | 0.001131775 | 1.131774571      | 0.084460789 |
|                                  |           | 69          | 53898       | 0.001280196 | 1.280195926      | 0.095537009 |
|                                  |           | 53          | 75363       | 0.000703263 | 0.703262874      | 0.052482304 |
|                                  |           | 81          | 71463       | 0.001133454 | 1.133453675      | 0.084586095 |
|                                  |           | 83          | 82464       | 0.0010065   | 1.006499806      | 0.075111926 |
|                                  |           | 88          | 73612       | 0.001195457 | 1.195457262      | 0.089213229 |
|                                  |           | 74          | 95947       | 0.000771259 | 0.771259133      | 0.057556652 |
|                                  |           | 137         | 97145       | 0.001410263 | 1.410263009      | 0.105243508 |
|                                  |           | 130         | 97491       | 0.001333456 | 1.333456422      | 0.099511673 |
| 111                              | 89996     | 0.001233388 | 1.233388151 | 0.092043892 |                  |             |
| pTK<br>(positive control)        | RPE-1     | 611         | 57982       | 0.010537753 | 10.5377531       | 0.786399485 |
|                                  |           | 863         | 73764       | 0.011699474 | 11.699474        | 0.873095074 |
|                                  |           | 145         | 12346       | 0.011744695 | 11.74469464      | 0.876469749 |
|                                  |           | 99          | 8325        | 0.011891892 | 11.89189189      | 0.887454619 |
|                                  |           | 454         | 37162       | 0.012216781 | 12.21678058      | 0.911700043 |
|                                  |           | 299         | 22923       | 0.013043668 | 13.04366793      | 0.973408055 |
|                                  |           | 465         | 32411       | 0.014346981 | 14.34698096      | 1.070670221 |
|                                  |           | 345         | 23357       | 0.014770733 | 14.77073254      | 1.102293473 |
|                                  |           | 461         | 29724       | 0.015509353 | 15.50935271      | 1.157414381 |
|                                  |           | 27          | 1708        | 0.015807963 | 15.80796253      | 1.179698696 |
|                                  | 502       | 31494       | 0.015939544 | 15.93954404 | 1.189518212      |             |



| Individual | Fragment    | Cell Line   | Firefly | Renilla     | Ratio       | Adjusted ratio | Ratio:pTK   |
|------------|-------------|-------------|---------|-------------|-------------|----------------|-------------|
| RP15011    | BiP-MSR1-3x | RPE-1       | 24      | 49509       | 0.00048476  | 0.484760347    | 0.036176145 |
|            |             |             | 26      | 49690       | 0.000523244 | 0.523244114    | 0.039048068 |
|            |             |             | 25      | 45570       | 0.000548607 | 0.548606539    | 0.040940787 |
|            |             |             | 4       | 7193        | 0.000556096 | 0.556096205    | 0.041499717 |
|            |             |             | 43      | 65187       | 0.000659641 | 0.659640726    | 0.04922692  |
|            |             |             | 33      | 49006       | 0.000673387 | 0.673386932    | 0.050252756 |
|            |             |             | 41      | 48051       | 0.00085326  | 0.853260078    | 0.063676125 |
|            |             |             | 42      | 48532       | 0.000865408 | 0.86540839     | 0.064582716 |
|            |             |             | 55      | 61759       | 0.000890558 | 0.890558461    | 0.066459587 |
|            |             |             | 66      | 72606       | 0.000909016 | 0.909015784    | 0.067836999 |
|            |             |             | 38      | 40175       | 0.000945862 | 0.945861854    | 0.070586706 |
|            |             |             | 61      | 61803       | 0.000987007 | 0.987007103    | 0.073657247 |
|            |             |             | 48      | 48429       | 0.000991142 | 0.991141671    | 0.073965796 |
|            |             |             | 47      | 44649       | 0.001052655 | 1.052655155    | 0.078556355 |
|            |             |             | 52      | 49191       | 0.001057104 | 1.057103942    | 0.078888354 |
|            |             |             | 75      | 68462       | 0.001095498 | 1.095498233    | 0.081753599 |
|            |             |             | 79      | 62395       | 0.001266127 | 1.266127094    | 0.094487097 |
|            |             |             | 5       | 2402        | 0.002081599 | 2.081598668    | 0.155343184 |
| III.7      | BiP-MSR1-4x | RPE-1       | 72      | 892         | 0.080717489 | 80.71748879    | 6.023693193 |
|            |             |             | 914     | 11250       | 0.081248055 | 81.24805547    | 6.063287722 |
|            |             |             | 1338    | 15946       | 0.083910821 | 83.91082123    | 6.262001585 |
|            |             |             | 1497    | 17623       | 0.084945809 | 84.94580945    | 6.339239511 |
|            |             |             | 1164    | 11492       | 0.101287852 | 101.2878524    | 7.558794957 |
|            |             |             | 2419    | 23786       | 0.101698478 | 101.6984781    | 7.589438664 |
|            |             |             | 1172    | 11427       | 0.102568591 | 102.5685906    | 7.65437243  |
|            |             |             | 1358    | 12970       | 0.104707198 | 104.7071977    | 7.813969974 |
|            |             |             | 2015    | 18896       | 0.106639147 | 106.6391469    | 7.95814529  |
|            |             |             | 2006    | 18589       | 0.107913282 | 107.913282     | 8.053230004 |
|            |             |             | 930     | 7923        | 0.117387188 | 117.3871884    | 8.760237939 |
|            |             |             | 1567    | 13159       | 0.119081997 | 119.0819971    | 8.886716202 |
|            |             |             | 125     | 1035        | 0.120772947 | 120.7729469    | 9.012906482 |
|            |             |             | 218     | 1777        | 0.122678672 | 122.6786719    | 9.15512477  |
|            |             |             | 1929    | 15596       | 0.12368556  | 123.6855604    | 9.230265702 |
|            |             |             | 1575    | 11647       | 0.135227956 | 135.2279557    | 10.09163848 |
|            |             |             | 802     | 5738        | 0.139769955 | 139.7699547    | 10.43059363 |
|            |             |             | RP15011 | BiP-MSR1-3x | HeLa        | 10             | 1985        |
| 13         | 2133        | 0.006094702 |         |             |             | 6.094702297    | 0.141737263 |
| 11         | 1744        | 0.006307339 |         |             |             | 6.30733945     | 0.146682313 |
| 14         | 2020        | 0.006930693 |         |             |             | 6.930693069    | 0.161178909 |
| 16         | 2200        | 0.007272727 |         |             |             | 7.272727273    | 0.169133192 |
| 11         | 1391        | 0.00790798  |         |             |             | 7.907979871    | 0.183906509 |
| 12         | 1424        | 0.008426966 |         |             |             | 8.426966292    | 0.19597596  |
| 19         | 2076        | 0.009152216 |         |             |             | 9.1522158      | 0.212842228 |
| 10         | 979         | 0.010214505 |         |             |             | 10.2145046     | 0.237546619 |
| 15         | 12538       | 0.001196363 |         |             |             | 11.96363056    | 0.278223967 |
| 13         | 951         | 0.013669821 |         |             |             | 13.66982124    | 0.31790282  |
| 19         | 1371        | 0.013858497 |         |             |             | 13.85849745    | 0.322290638 |
| III.7      | BiP-MSR1-4x | HeLa        |         |             |             | 342            | 1020        |
|            |             |             | 368     | 963         | 0.381980486 | 381.9804858    | 8.883267111 |

|  |  |  |     |        |             |             |             |
|--|--|--|-----|--------|-------------|-------------|-------------|
|  |  |  | 507 | 1182   | 0.42893401  | 428.9340102 | 9.975209538 |
|  |  |  | 577 | 1345   | 0.428996283 | 428.9962825 | 9.976657733 |
|  |  |  | 532 | 1228   | 0.433083686 | 433.0836861 | 10.07171363 |
|  |  |  | 455 | 996    | 0.45691906  | 456.9190601 | 10.62602465 |
|  |  |  | 523 | 1140   | 0.45877193  | 458.7719298 | 10.66911465 |
|  |  |  | 717 | 1453   | 0.493393889 | 493.3938893 | 11.4742765  |
|  |  |  | 570 | 1138   | 0.500966778 | 500.966778  | 11.65039019 |
|  |  |  | 502 | 1001   | 0.501498501 | 501.4985015 | 11.66275585 |
|  |  |  | 601 | 1088   | 0.552389706 | 552.3897059 | 12.84627223 |
|  |  |  | 646 | 1139   | 0.567064607 | 567.0646067 | 13.18754899 |
|  |  |  | 718 | 1258.8 | 0.570384493 | 570.3844932 | 13.26475566 |
|  |  |  | 725 | 1269   | 0.571315997 | 571.3159968 | 13.28641853 |

| Fragment    | Orientation | Firefly | Renilla | Ratio       | Ratio:pTK   |
|-------------|-------------|---------|---------|-------------|-------------|
| pTK-MSR1-2x | (+)         | 50      | 532     | 93.98496241 | 2.09320629  |
| pTK-MSR1-2x | (+)         | 87      | 800     | 108.75      | 2.422048998 |
| pTK-MSR1-2x | (+)         | 75      | 671     | 111.7734724 | 2.489386914 |
| pTK-MSR1-2x | (+)         | 181     | 1580    | 114.556962  | 2.551380001 |
| pTK-MSR1-2x | (+)         | 161     | 1340    | 120.1492537 | 2.675929927 |
| pTK-MSR1-2x | (+)         | 176     | 1393    | 126.3460158 | 2.813942445 |
| pTK-MSR1-2x | (+)         | 182     | 1411    | 128.9865344 | 2.872751322 |
| pTK-MSR1-2x | (+)         | 176     | 1308    | 134.5565749 | 2.996805678 |
| pTK-MSR1-2x | (+)         | 238     | 1571    | 151.4958625 | 3.374072662 |
| pTK-MSR1-2x | (+)         | 88      | 575     | 153.0434783 | 3.408540719 |
| pTK-MSR1-2x | (+)         | 213     | 1305    | 163.2183908 | 3.63515347  |
| pTK-MSR1-2x | (-)         | 159     | 1512    | 105.1587302 | 2.34206526  |
| pTK-MSR1-2x | (-)         | 47      | 727     | 64.64924347 | 1.43984952  |
| pTK-MSR1-2x | (-)         | 52      | 800     | 65          | 1.44766147  |
| pTK-MSR1-2x | (-)         | 115     | 1607    | 71.56191661 | 1.593806606 |
| pTK-MSR1-2x | (-)         | 37      | 498.667 | 74.19786096 | 1.652513607 |
| pTK-MSR1-2x | (-)         | 47      | 617.667 | 76.09282245 | 1.694717649 |
| pTK-MSR1-2x | (-)         | 67      | 691     | 96.96092619 | 2.159486107 |
| pTK-MSR1-2x | (-)         | 99      | 928.7   | 106.6006245 | 2.37417872  |
| pTK-MSR1-2x | (-)         | 193     | 1747    | 110.4751002 | 2.460469937 |
| pTK-MSR1-2x | (-)         | 96      | 809     | 118.6650185 | 2.642873464 |
| pTK-MSR1-2x | (-)         | 219     | 1780    | 123.0337079 | 2.740171667 |
| pTK-MSR1-3x | (+)         | 93      | 2275    | 0.040873731 | 0.910328083 |
| pTK-MSR1-3x | (+)         | 44      | 1036    | 0.042471042 | 0.94590295  |
| pTK-MSR1-3x | (+)         | 82      | 1845    | 0.044434811 | 0.989639441 |
| pTK-MSR1-3x | (+)         | 64      | 1117    | 0.057296329 | 1.276087516 |
| pTK-MSR1-3x | (+)         | 69      | 1123    | 0.061442565 | 1.368431282 |
| pTK-MSR1-3x | (+)         | 17      | 275     | 0.061818182 | 1.376796922 |
| pTK-MSR1-3x | (+)         | 71      | 1134    | 0.062610229 | 1.394437178 |
| pTK-MSR1-3x | (+)         | 25      | 359     | 0.069637883 | 1.550955078 |
| pTK-MSR1-3x | (+)         | 76      | 1049    | 0.072449952 | 1.613584685 |
| pTK-MSR1-3x | (-)         | 87      | 2147    | 0.040521658 | 0.902486818 |
| pTK-MSR1-3x | (-)         | 65      | 1604    | 0.040523691 | 0.902532088 |
| pTK-MSR1-3x | (-)         | 75      | 1772    | 0.042325056 | 0.942651591 |
| pTK-MSR1-3x | (-)         | 113     | 2418    | 0.046732837 | 1.040820424 |
| pTK-MSR1-3x | (-)         | 82      | 1666.5  | 0.04920492  | 1.095877962 |

|             |     |     |        |             |             |
|-------------|-----|-----|--------|-------------|-------------|
| pTK-MSR1-3x | (-) | 43  | 859    | 0.050058207 | 1.114882121 |
| pTK-MSR1-3x | (-) | 31  | 605    | 0.051239669 | 1.14119531  |
| pTK-MSR1-3x | (-) | 82  | 1538   | 0.053315995 | 1.187438637 |
| pTK-MSR1-3x | (-) | 101 | 1795   | 0.056267409 | 1.253171703 |
| pTK-MSR1-3x | (-) | 42  | 649    | 0.064714946 | 1.44131283  |
| pTK-MSR1-3x | (-) | 168 | 2495.6 | 0.067318481 | 1.499298007 |
| pTK-MSR1-4x | (+) | 30  | 1918   | 0.015641293 | 0.348358419 |
| pTK-MSR1-4x | (+) | 11  | 662    | 0.016616314 | 0.370073813 |
| pTK-MSR1-4x | (+) | 33  | 1749   | 0.018867925 | 0.420221036 |
| pTK-MSR1-4x | (+) | 14  | 651    | 0.021505376 | 0.478961611 |
| pTK-MSR1-4x | (+) | 47  | 2149   | 0.021870638 | 0.487096604 |
| pTK-MSR1-4x | (+) | 32  | 1411   | 0.022678951 | 0.505099134 |
| pTK-MSR1-4x | (+) | 125 | 4491   | 0.027833445 | 0.619898545 |
| pTK-MSR1-4x | (+) | 62  | 2157.7 | 0.0287343   | 0.639962147 |
| pTK-MSR1-4x | (+) | 20  | 635    | 0.031496063 | 0.701471336 |
| pTK-MSR1-4x | (+) | 202 | 5805.5 | 0.034794591 | 0.774935219 |
| pTK-MSR1-4x | (+) | 75  | 1988.8 | 0.037711183 | 0.839892709 |
| pTK-MSR1-4x | (-) | 72  | 2370   | 0.030379747 | 0.676609061 |
| pTK-MSR1-4x | (-) | 56  | 1772   | 0.031602709 | 0.703846521 |
| pTK-MSR1-4x | (-) | 61  | 1899   | 0.032122217 | 0.715415803 |
| pTK-MSR1-4x | (-) | 43  | 1325   | 0.03245283  | 0.722780182 |
| pTK-MSR1-4x | (-) | 26  | 758    | 0.034300792 | 0.763937451 |
| pTK-MSR1-4x | (-) | 35  | 934.4  | 0.037457192 | 0.834235897 |
| pTK-MSR1-4x | (-) | 70  | 1813   | 0.038610039 | 0.859911773 |
| pTK-MSR1-4x | (-) | 79  | 1969   | 0.040121889 | 0.89358328  |
| pTK-MSR1-4x | (-) | 73  | 1706   | 0.042790152 | 0.953010076 |
